# Supplementary material for: Combined assembly of long and short sequencing reads improve the efficiency of exploring the soil metagenome
Source: PubMed Central journal article supplement (PMC8742384; doi:10.1186/s12864-021-08260-3), 2022-01-07
Supplement: 12864_2021_8260_MOESM1_ESM.pdf [file 12864_2021_8260_MOESM1_ESM.pdf]

# Supplementary materials

1

2 **Figure S1** | the contig number (A) and genera number (B) were normalized by the clean  
3 data size (unit: Gb).

4 Note: the clean data size of PI (Combined assembly) is the sum of the clean data size of the  
5 other two methods(PB, PacBio; IL, illumina), the detailed clean data size was showed in Table S1.

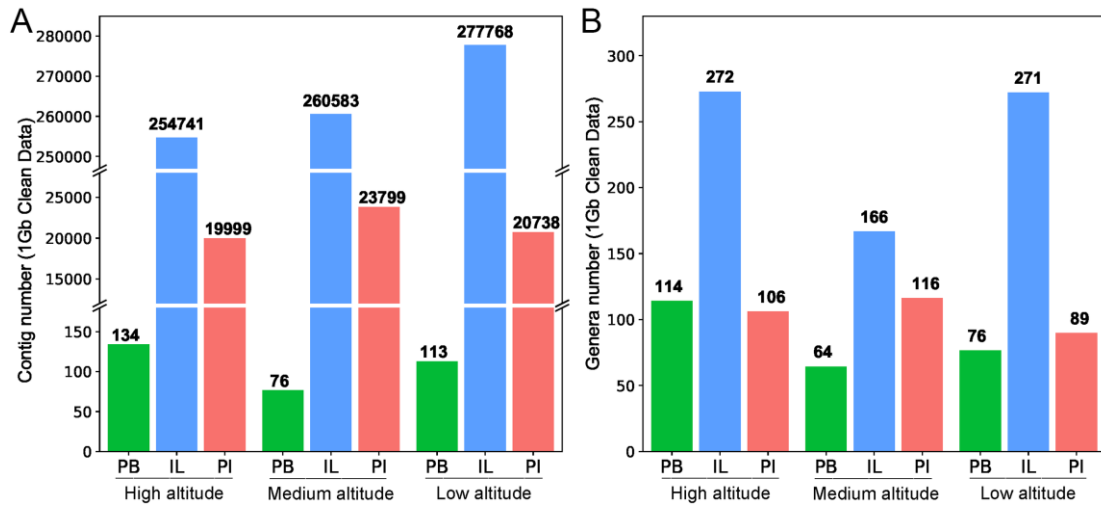

6

7 **Figure S2** | the distribution of gene length in samples at different altitudes.

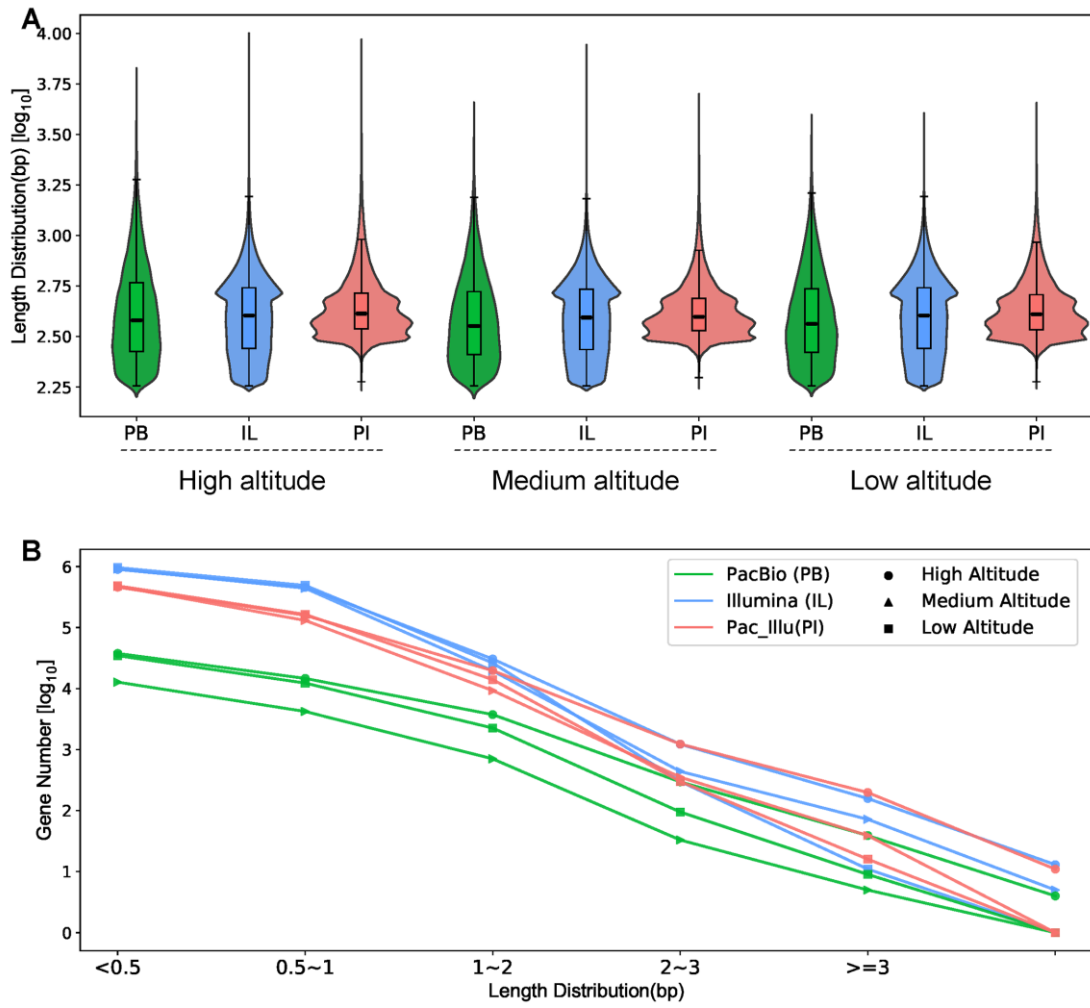

8

9

10 **Figure S3** | the predicted protein sequences were used to perform orthologous gene  
 11 analysis, and Venn diagrams are drawn to show the overlap between the three assembly  
 12 techniques. Here are the results of ortholog genes analysis of different samples.

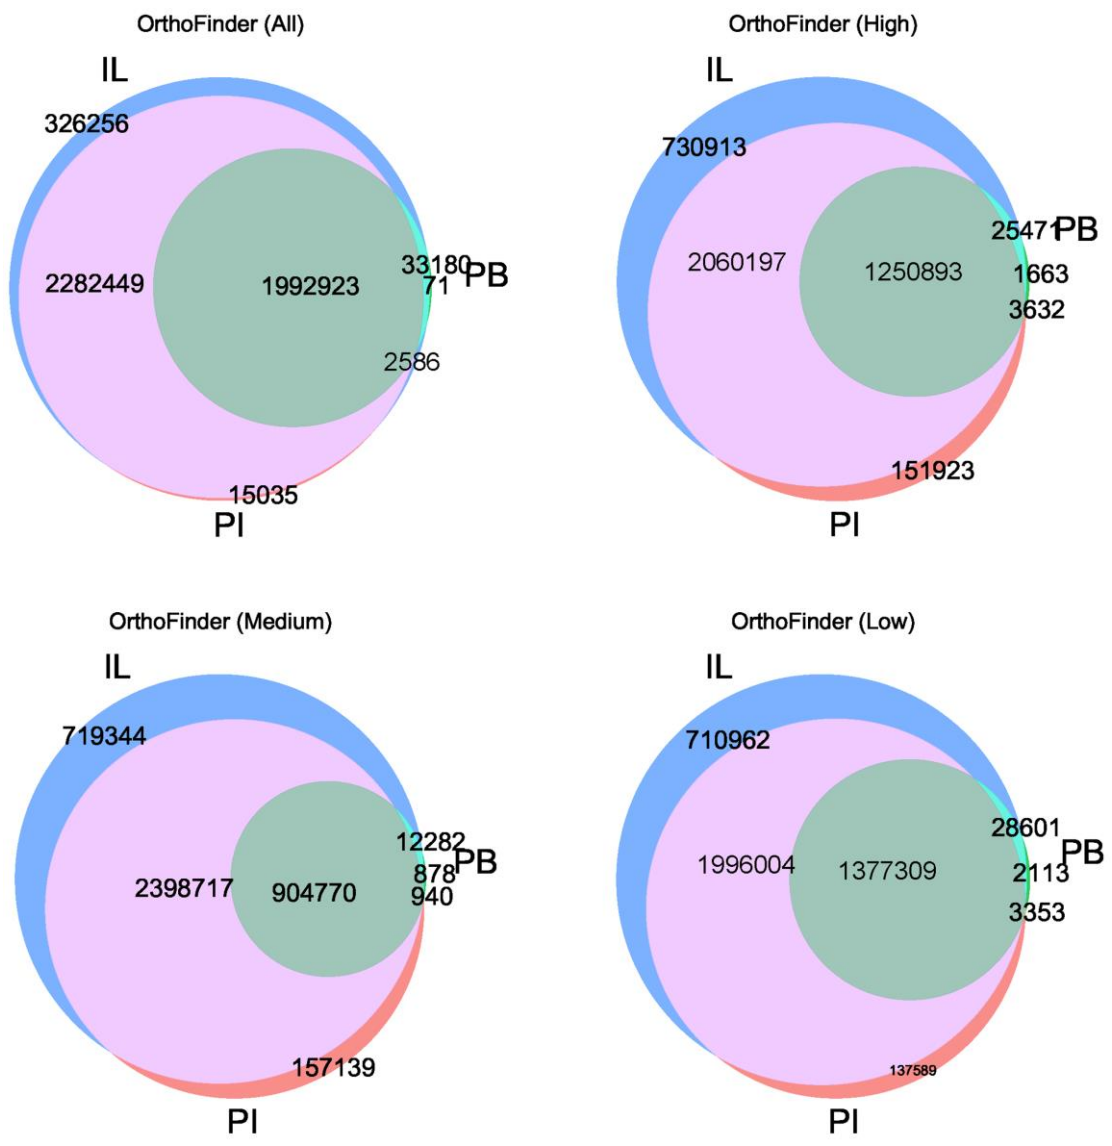

13  
 14

15 **Figure S4** | the Corresponding Gene Number of Each COG's Proteins

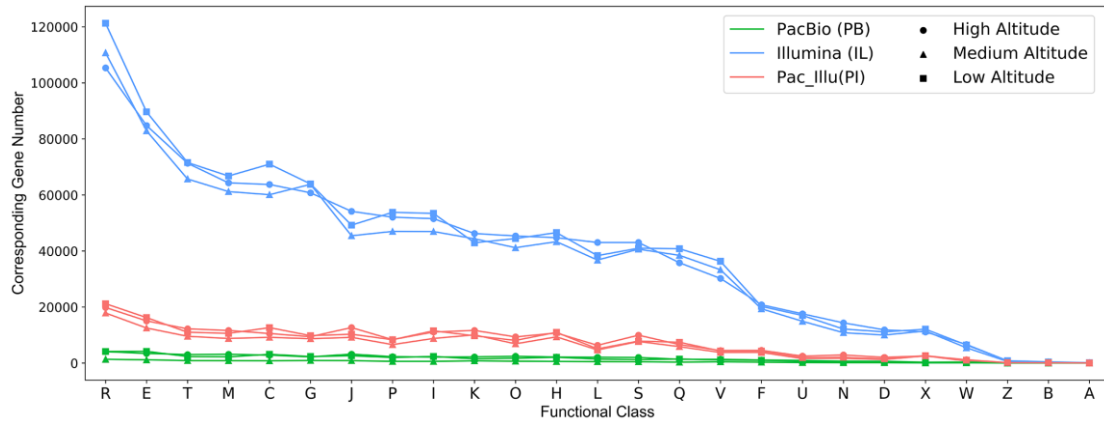

16

17

18 **Figure S5** | Gene Functional Annotation of Each Method (KEGG)

19 (A) Metabolic pathways predicted by PacBio

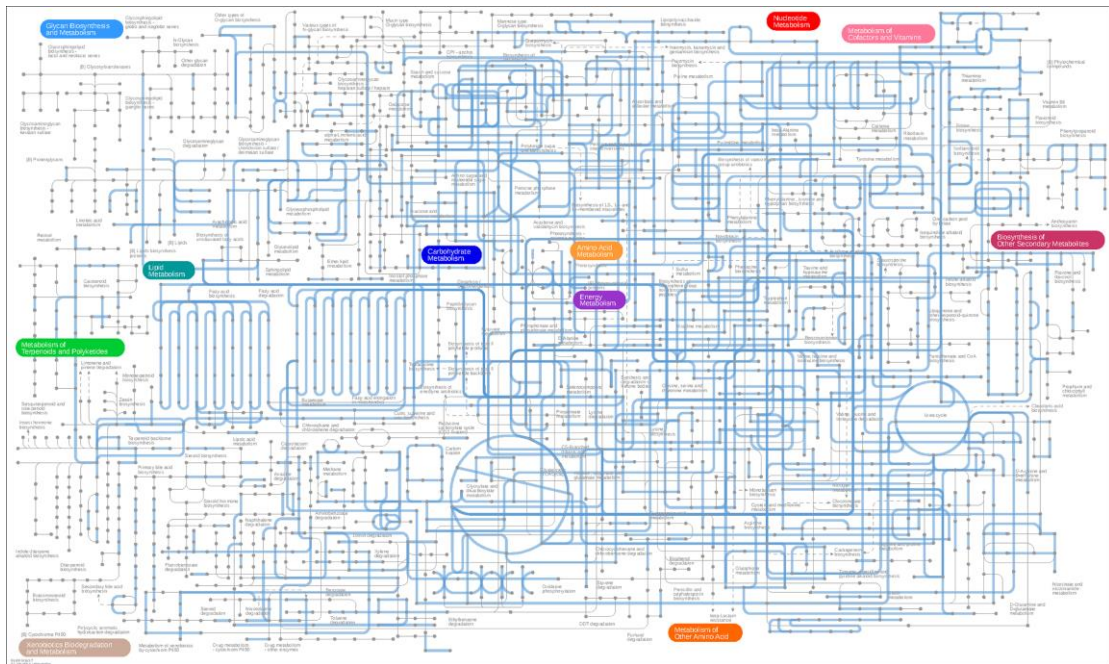

20

21

22 (B) Metabolic pathways predicted by Illumina

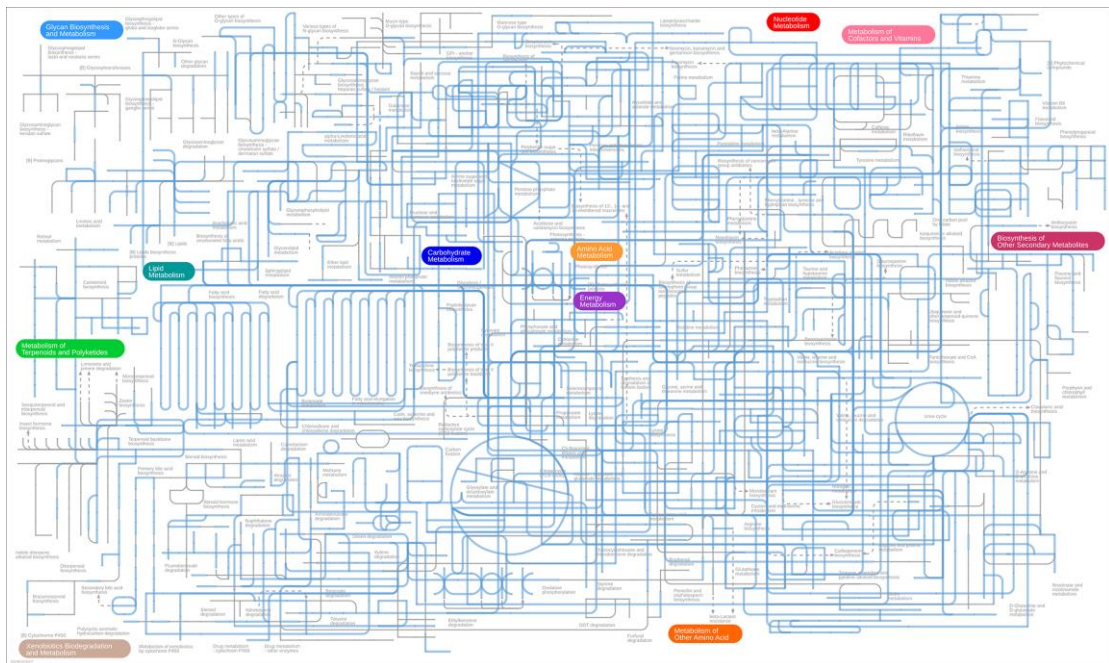

23

24

25

(C) Metabolic pathways predicted by PacBio\_Illumina

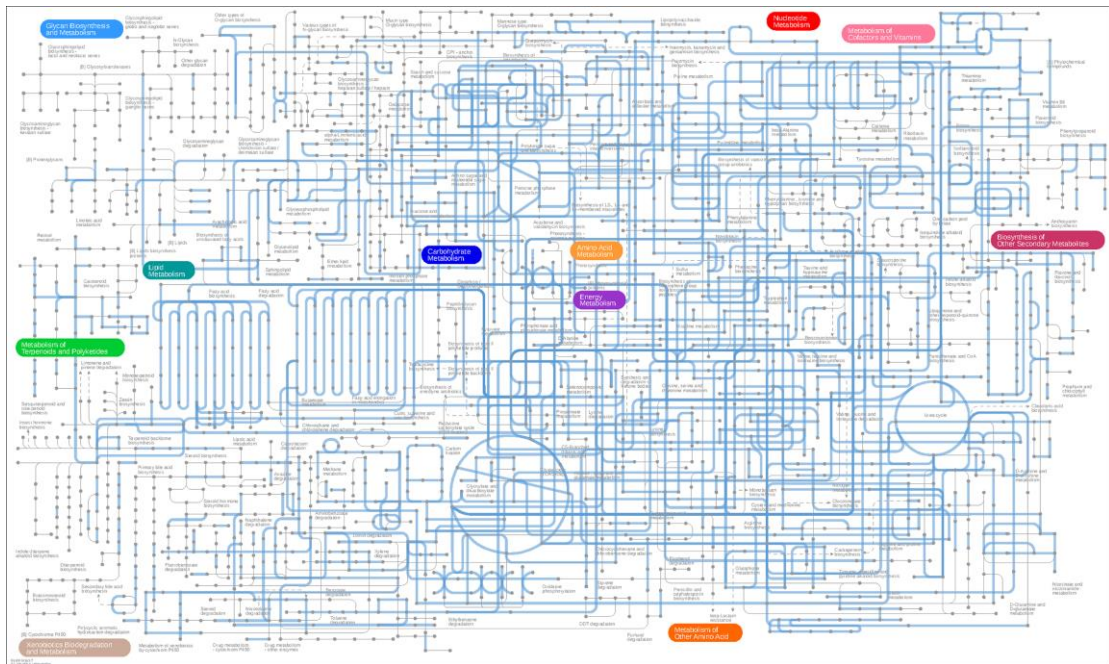

26

27

28 **Figure S6** | the taxonomic diversity and abundance of three levels (genera, families and  
 29 orders)

30 The number of genera (or families or orders) shown in the column chart, and the stacked  
 31 histogram shown the most abundant 20 genera (or families or orders) and the "LOW  
 32 ABUNDANCE" which composed of other genera (or families or orders).

33 Genera:

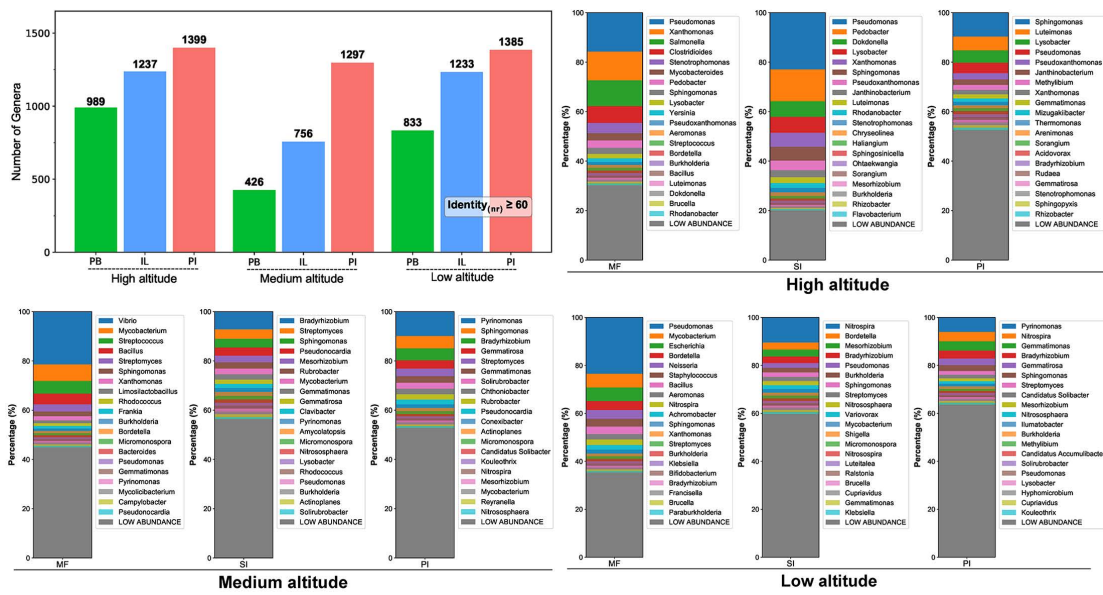

34

35 Family:

36

37

38 Order:

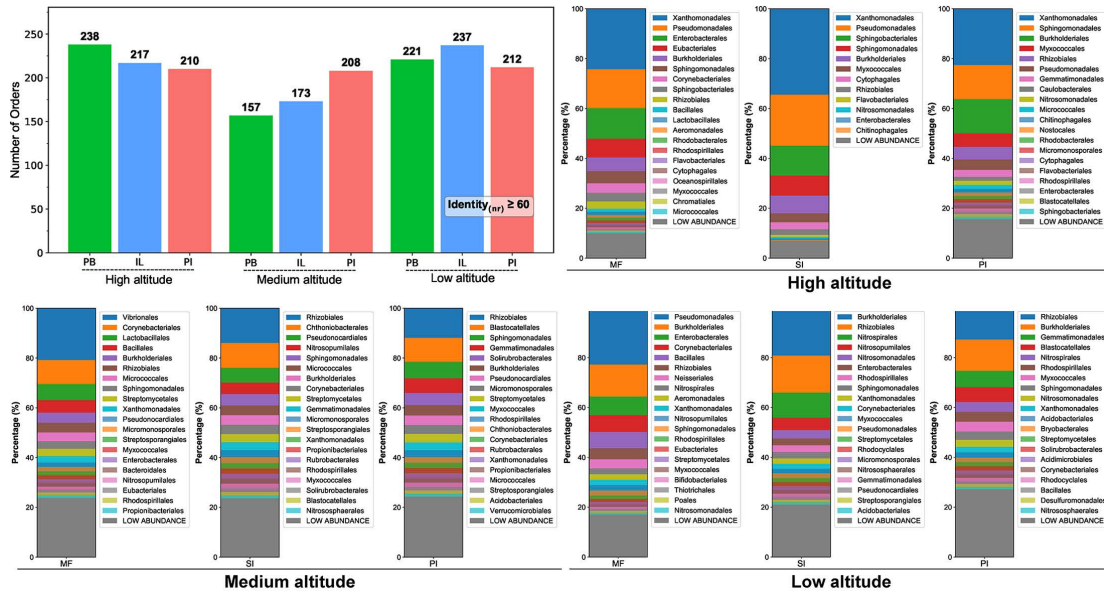

39

40



41

**Figure S7** | Comparison of PI and IL assembly in microbial annotation

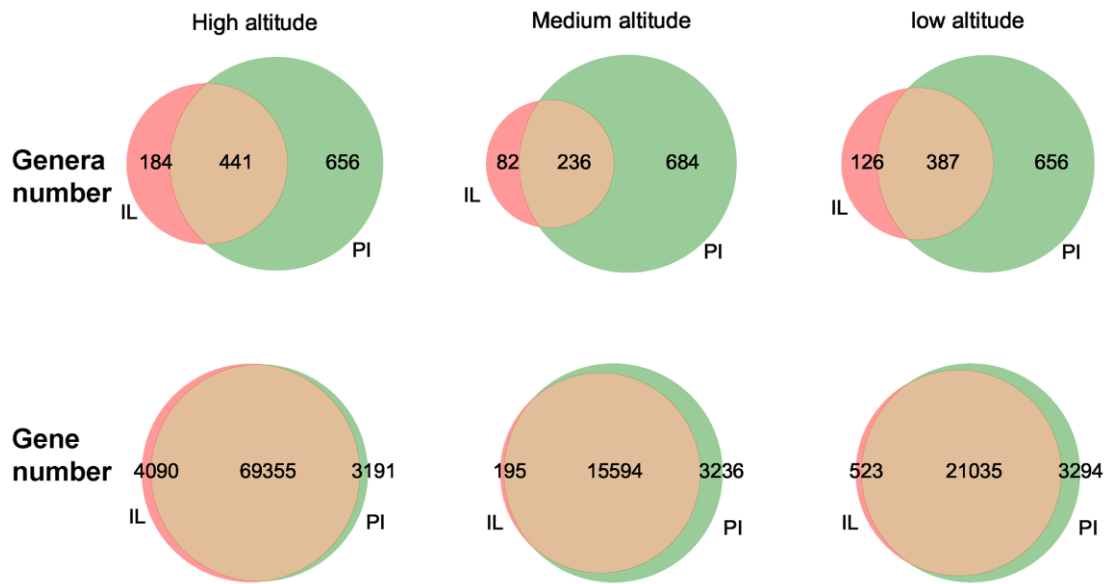

42

43

44 **Figure S8** | the abundance at different taxonomic levels in the analysis of secondary  
 45 metabolism

46 Note: " LOW ABUNDANCE " consisted of species with abundance less than 0.5%.

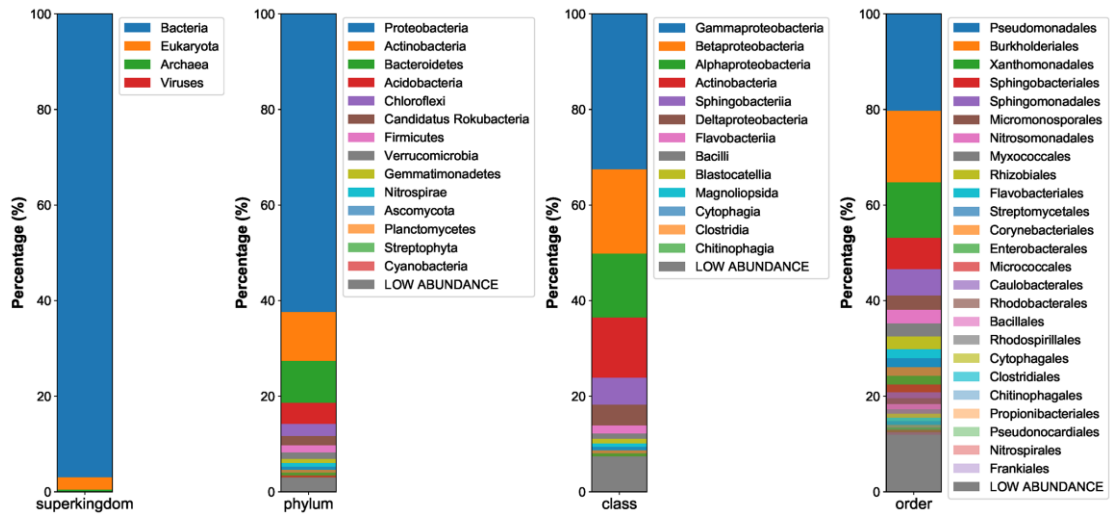

49 **Figure S9** | the relationship of genera among three altitude locations

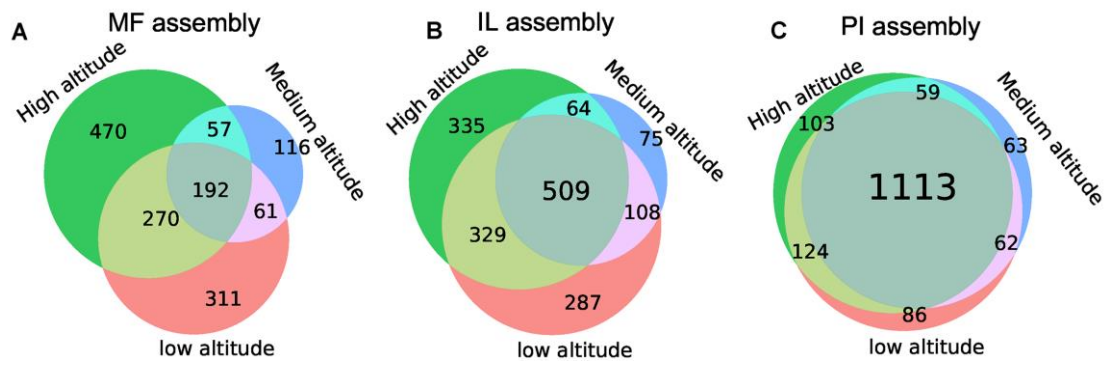

50

51 **Figure S10** | Comparison of IDBA and metaSPAdes in IL assembly

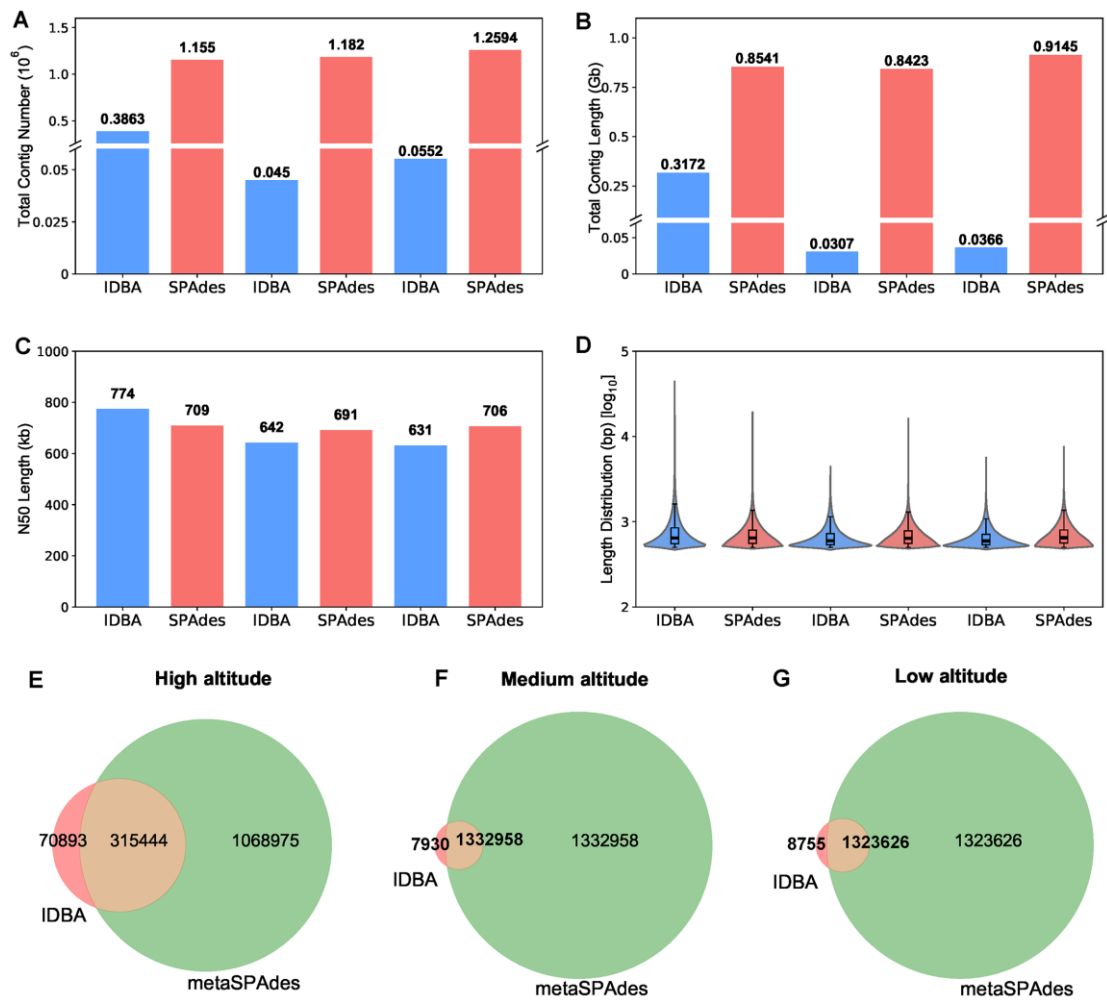

52

53

54 **Table S1** | General information on the metagenome sequences

| Parameters                | Altitude | Methods   |            |                 |
|---------------------------|----------|-----------|------------|-----------------|
|                           |          | PacBio    | Illumina   | PacBio_Illumina |
| Clean Data<br>Length (Mb) | High     | 8,662     | 4,534      | Mix             |
|                           | Medium   | 6,616     | 4,536      | Mix             |
|                           | Low      | 10,897    | 4,534      | Mix             |
| Clean Data<br>Reads       | High     | 1,191,948 | 32,756,894 | Mix             |
|                           | Medium   | 871,813   | 32,617,286 | Mix             |
|                           | Low      | 1,583,970 | 32,523,820 | Mix             |
| GC Content (%)            | High     | 61.32     | 64.20      | 62.01           |
|                           | Medium   | 65.16     | 65.52      | 64.27           |
|                           | Low      | 63.50     | 64.88      | 63.69           |
| N90 (bp)                  | High     | 24,243    | 531        | 574             |
|                           | Medium   | 22,619    | 529        | 546             |
|                           | Low      | 20,370    | 532        | 572             |
| Min (bp)                  | High     | 530       | 500        | 500             |
|                           | Medium   | 1,823     | 500        | 500             |
|                           | Low      | 139       | 500        | 500             |
| Max (bp)                  | High     | 607,831   | 18,606     | 125,626         |
|                           | Medium   | 201,162   | 15,115     | 59,996          |
|                           | Low      | 215,241   | 7,338      | 30,022          |
| ≤1kb (%)                  | High     | 0.77      | 84.73      | 67.59           |
|                           | Medium   | 0.00      | 90.74      | 71.66           |
|                           | Low      | 0.32      | 89.14      | 63.47           |
| Average (≤1kb) (%)        |          | 0.45      | 89.53      | 67.31           |

56 **Table S2** | Total Gene Length and Distribution

|                           |        | Altitude | Methods    |               |                 |
|---------------------------|--------|----------|------------|---------------|-----------------|
|                           |        |          | PacBio     | Illumina      | PacBio_Illumina |
| Total Gene<br>Length (bp) | High   |          | 27,415,281 | 616,818,174   | 303,042,687     |
|                           | Medium |          | 7,773,057  | 591,292,800   | 271,568,379     |
|                           | Low    |          | 22,225,644 | 649,938,207   | 304,547,418     |
| Sum                       |        |          | 57,413,982 | 1,858,049,181 | 879,158,484     |

57

58 **Table S3** | Gene Length Distribution

|                             | Length     | Methods |          |                 |
|-----------------------------|------------|---------|----------|-----------------|
|                             |            | PacBio  | Illumina | PacBio_Illumina |
| Gene Length<br>Distribution | <0.5kb     | 84,994  | 2766188  | 1,413,875       |
|                             | 0.5~1kb    | 31,158  | 1386383  | 453,113         |
|                             | 1~2kb      | 6,705   | 76329    | 42,938          |
|                             | 2~3kb      | 421     | 1960     | 1,882           |
|                             | $\geq$ 3kb | 53      | 254      | 260             |

59

60 **Table S4** The detailed function classes in Fig. 3A are described as follows:

| Classes of COG | Detailed function classes of COG                              |
|----------------|---------------------------------------------------------------|
| A              | RNA processing and modification                               |
| B              | Chromatin structure and dynamics                              |
| C              | Energy production and conversion                              |
| D              | Cell cycle control, cell division, chromosome partitioning    |
| E              | Amino acid transport and metabolism                           |
| F              | Nucleotide transport and metabolism                           |
| G              | Carbohydrate transport and metabolism                         |
| H              | Coenzyme transport and metabolism                             |
| I              | Lipid transport and metabolism                                |
| J              | Translation, ribosomal structure and biogenesis               |
| K              | Transcription                                                 |
| L              | Replication, recombination and repair                         |
| M              | Cell wall/membrane/envelope biogenesis                        |
| N              | Cell motility                                                 |
| O              | Posttranslational modification, protein turnover, chaperones  |
| P              | Inorganic ion transport and metabolism                        |
| Q              | Secondary metabolites biosynthesis, transport and catabolism  |
| R              | General function prediction only                              |
| S              | Function unknown                                              |
| T              | Signal transduction mechanisms                                |
| U              | Intracellular trafficking, secretion, and vesicular transport |
| V              | Defense mechanisms                                            |
| W              | Extracellular structures                                      |
| X              | Mobilome: prophages, transposons                              |
| Z              | Cytoskeleton                                                  |

61 The x ticks in panel A and panel C are arranged in descending order of PI data.
